# Supplementary material
Source: Springer Nature journal article supplement (https://www.springermedizin.de/resource/supplementary/13049_2011_294_MOESM7_ESM.pdf/9666282)

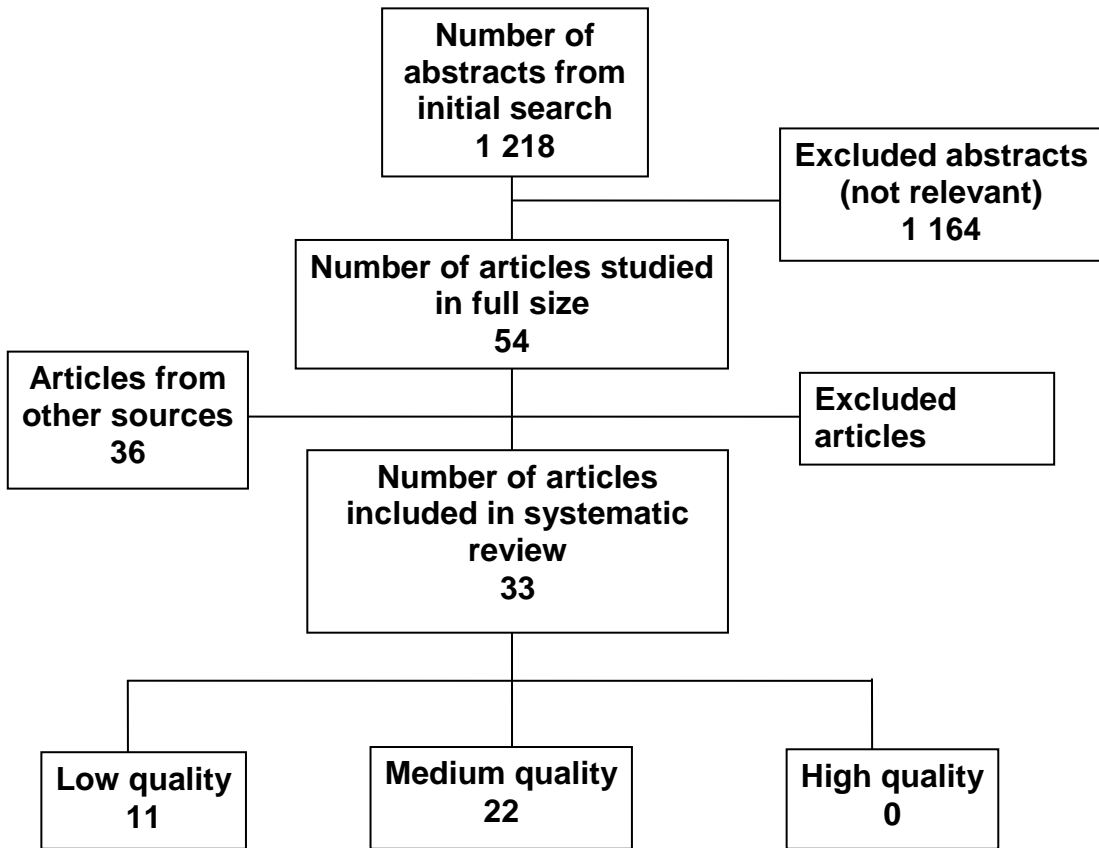

Supplement: MOESM7 [file 9666282]
